# Supplementary material for: Two-electron oxidized polyphenol chemistry-inspired superhydrophilic drug-carrying coatings for the construction of multifunctional nasolacrimal duct stents
Source: Royal Society of Chemistry journal article supplement (doi:10.1039/d3tb02668j), 2024-01-01
Supplement: d3tb02668j1.pdf [file d3tb02668j1.pdf]

## Supporting Information

### **Two-Electron Oxidized Polyphenol Chemistry-Inspired Superhydrophilic Drug-carrying Coatings for the Construction of Multifunctional Nasolacrimal Duct Stents**

Wenzhe Xiao,<sup>abc</sup> Binjian Wang,<sup>abc</sup> Xuemei Wang,<sup>bc</sup> Guanghong Zhang,<sup>bc</sup> Yihao  
Zhao,<sup>bc</sup> Zezhen Zhang,<sup>bc</sup> Linhua Li\*,<sup>d</sup> Chao Qu\*<sup>bc</sup>

- a. Eye School of Chengdu University of TCM, Chengdu, 610075, China.
- b. Department of Ophthalmology, Sichuan Provincial People's Hospital, University of Electronic Science and Technology of China, Chengdu, 611731, China.
- c. Sichuan Key Laboratory for Disease Gene Study, Sichuan Provincial People's Hospital, University of Electronic Science and Technology of China, Chengdu, 611731, China.
- d. Kidney Research Laboratory, Department of Nephrology, West China Hospital of Sichuan University, Chengdu 610041, China.

E-mail: [linhuali@scu.edu.cn](mailto:linhuali@scu.edu.cn); [lucyjeffersonqu@hotmail.com](mailto:lucyjeffersonqu@hotmail.com)

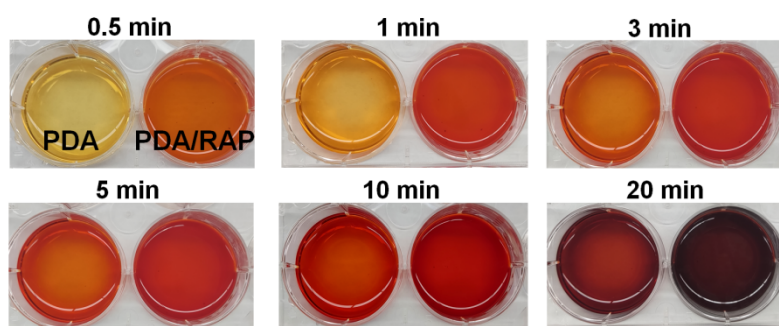

**Fig. S1.** Solution changes during coating preparation.

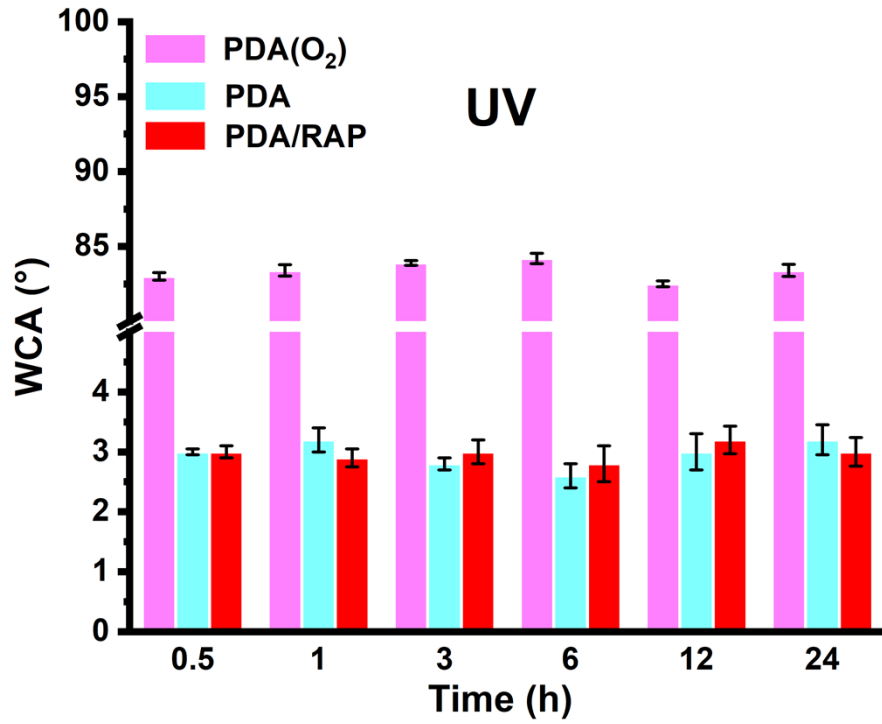

**Fig. S2.** Static WCA of samples after exposure to UV for different times.

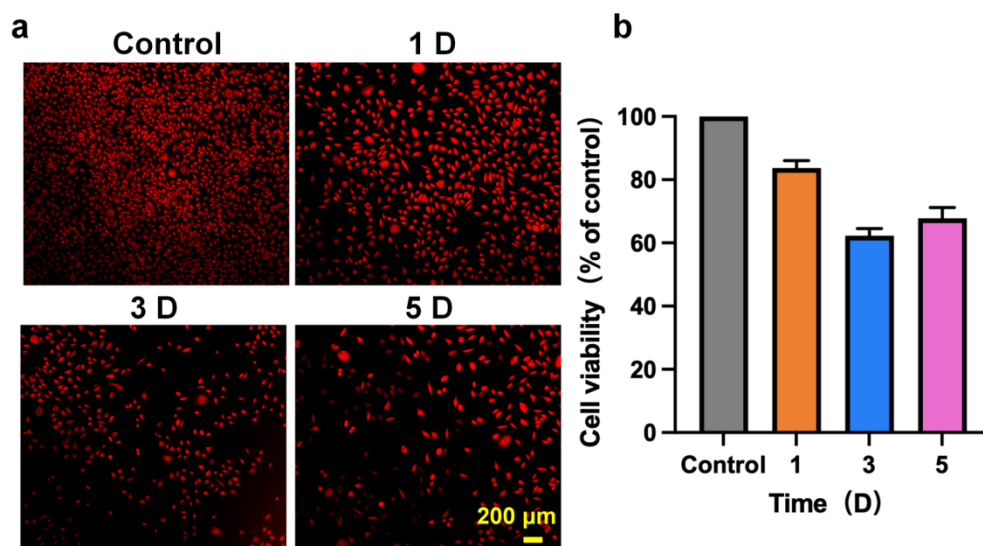

**Fig. S3.** (a) Fluorescence staining (Scale Bar 200  $\mu\text{m}$ ). (b) and cell viability of L929

cells co-cultured with coating release solution at different time points.

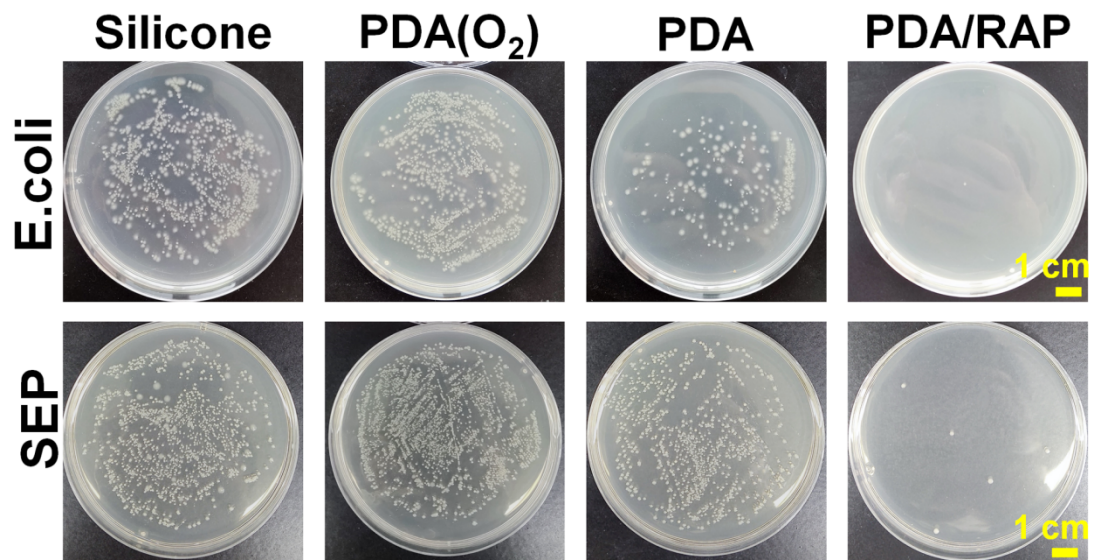

**Fig. S4.** Bacterial smear photograph of *E. coli* and *S. epidermidis* on the fresh sample (Scale Bar 1 cm).

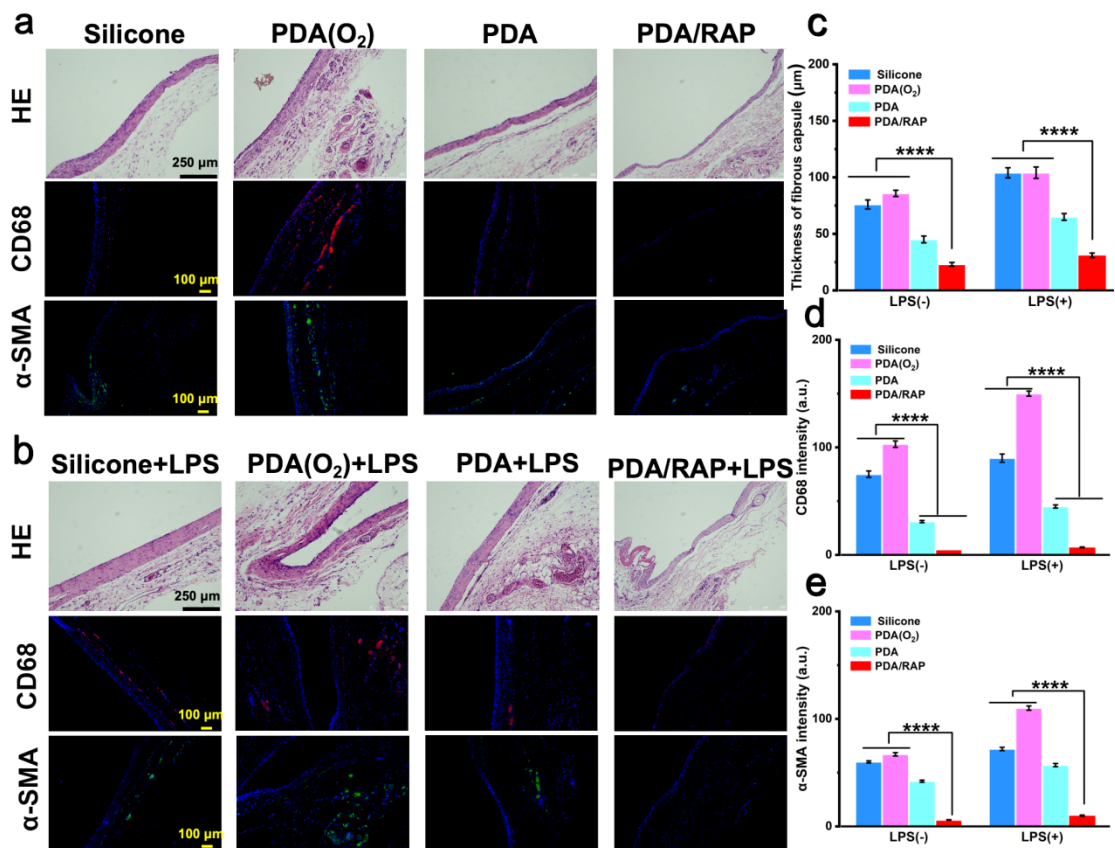

**Fig. S5.** In vivo SD rats implantation experiments for 15 days. H&E, CD68 antibody,  $\alpha$ -SMA antibody staining for 15 days after subcutaneous implantation without (a) and with (b) LPS stimulation (Scale Bar 250/100  $\mu$ m). (c) Thickness of the fibrous capsules of different samples. Immunofluorescence intensity of CD68 (d) and  $\alpha$ -SMA (e) of the capsules of different samples.

In Fig. S5a and 5b, H.E., CD68 and  $\alpha$ -SMA staining were used respectively to show the thickness of fibrosac and the degree of inflammatory cell infiltration 15 days after subcutaneous embedding in each group. Compared with silica gel group and PDA (O<sub>2</sub>) group, the thickness of fibrous sac and the degree of inflammatory cell aggregation and infiltration in PDA and PDA/RAP group were significantly reduced. Even when the stimulation was simulated with LPS, the trend in each group was consistent with that without LPS, indicating that the PDA/RAP coating has excellent anti-inflammatory properties (Fig. S5c). By CD68 and  $\alpha$ -SMA immunofluorescence staining and semi-quantitative data analysis (Fig. S5d-e), it was found that the degree of inflammatory infiltration and fibrosis of silica gel and PDA (O<sub>2</sub>) was significantly stronger than that of PDA and PDA/RAP, which further proved that PDA/RAP had good anti-inflammatory and anti-fibrosac proliferation biological properties.

| <b>Elements</b>           |              |             |              |
|---------------------------|--------------|-------------|--------------|
| <b>samples</b>            | <b>C(%)</b>  | <b>N(%)</b> | <b>O(%)</b>  |
| <b>PDA(O<sub>2</sub>)</b> | <b>63.81</b> | <b>6.4</b>  | <b>29.79</b> |
| <b>PDA</b>                | <b>72.02</b> | <b>8.78</b> | <b>19.2</b>  |
| <b>PDA/RAP</b>            | <b>70.54</b> | <b>9.28</b> | <b>20.18</b> |

**Table1:** Elemental composite ratio of PDA(O<sub>2</sub>), PDA, PDA/RAP coatings.
